# Supplementary material for: An association of CSF apolipoprotein E glycosylation and amyloid-beta 42 in individuals who carry the APOE4 allele
Source: Springer Nature journal article supplement (doi:10.1186/s13195-023-01239-0), 2023-05-23

**An Association of CSF Apolipoprotein E glycosylation and amyloid-beta 42 in individuals who carry the APOE4 allele**

**Supplementary File**

Cristiana J. Meuret<sup>1</sup>, Yueming Hu<sup>2</sup>, Sabrina Smadi<sup>1</sup>, Mikaila Ann Bantugan<sup>1</sup>, Haotian Xian<sup>1</sup>, Ashley E. Martinez<sup>1</sup>, Ronald M. Krauss<sup>3</sup>, Qiu-Lan Ma<sup>1</sup>, Dobrin Nedelkov<sup>2, a, \*</sup>,  
Hussein N Yassine<sup>1, a, \*</sup>

<sup>1</sup> University of Southern California, Los Angeles, CA

<sup>2</sup> Isoformix Inc., Phoenix, AZ

<sup>3</sup> University of California, San Francisco, CA

<sup>a</sup> These authors share senior authorship with equal contributions

\* To whom correspondence should be addressed: 9830 S. 51. St. Suite B-113, Phoenix AZ 85044, Tel. 602.295.4874, Email: [dobrin.nedelkov@isoformix.com](mailto:dobrin.nedelkov@isoformix.com); or 2250 Alcazar St, Rm 210, Los Angeles, CA, 90033, Email: [hyassine@usc.edu](mailto:hyassine@usc.edu).

## Supplementary Figures

**Fig. 1S.** The % glycosylation of apoE, A $\beta$ <sub>42</sub>, Tau, and pTau, as a function of clinical status (NCI, MCI, and AD).

**Fig. 2S.** The % glycosylation of apoE by genotype.

**Fig. 3S.** The % glycosylation of apoE is significantly lower in CSF than plasma. Total apoE glycosylation was computed by dividing the peak intensity of the glycosylated forms with the total apoE peak intensity (n = 106). The groups were compared using a linear regression model.

**Fig. 4S.** Association between small HDL particles and CSF A $\beta$ <sub>42</sub> levels.

**Fig. 5S.** Mass spectra resulting from the MSIA analyses of apoE3 isolated from CSF (fully sialylated), and CSF apoE3 isolated after desialylation with sialidase. The shift in signal from m/z = 35,179 to m/z = 34,603 is indicative of the removal of two sialic acids.

**Figure 1S**

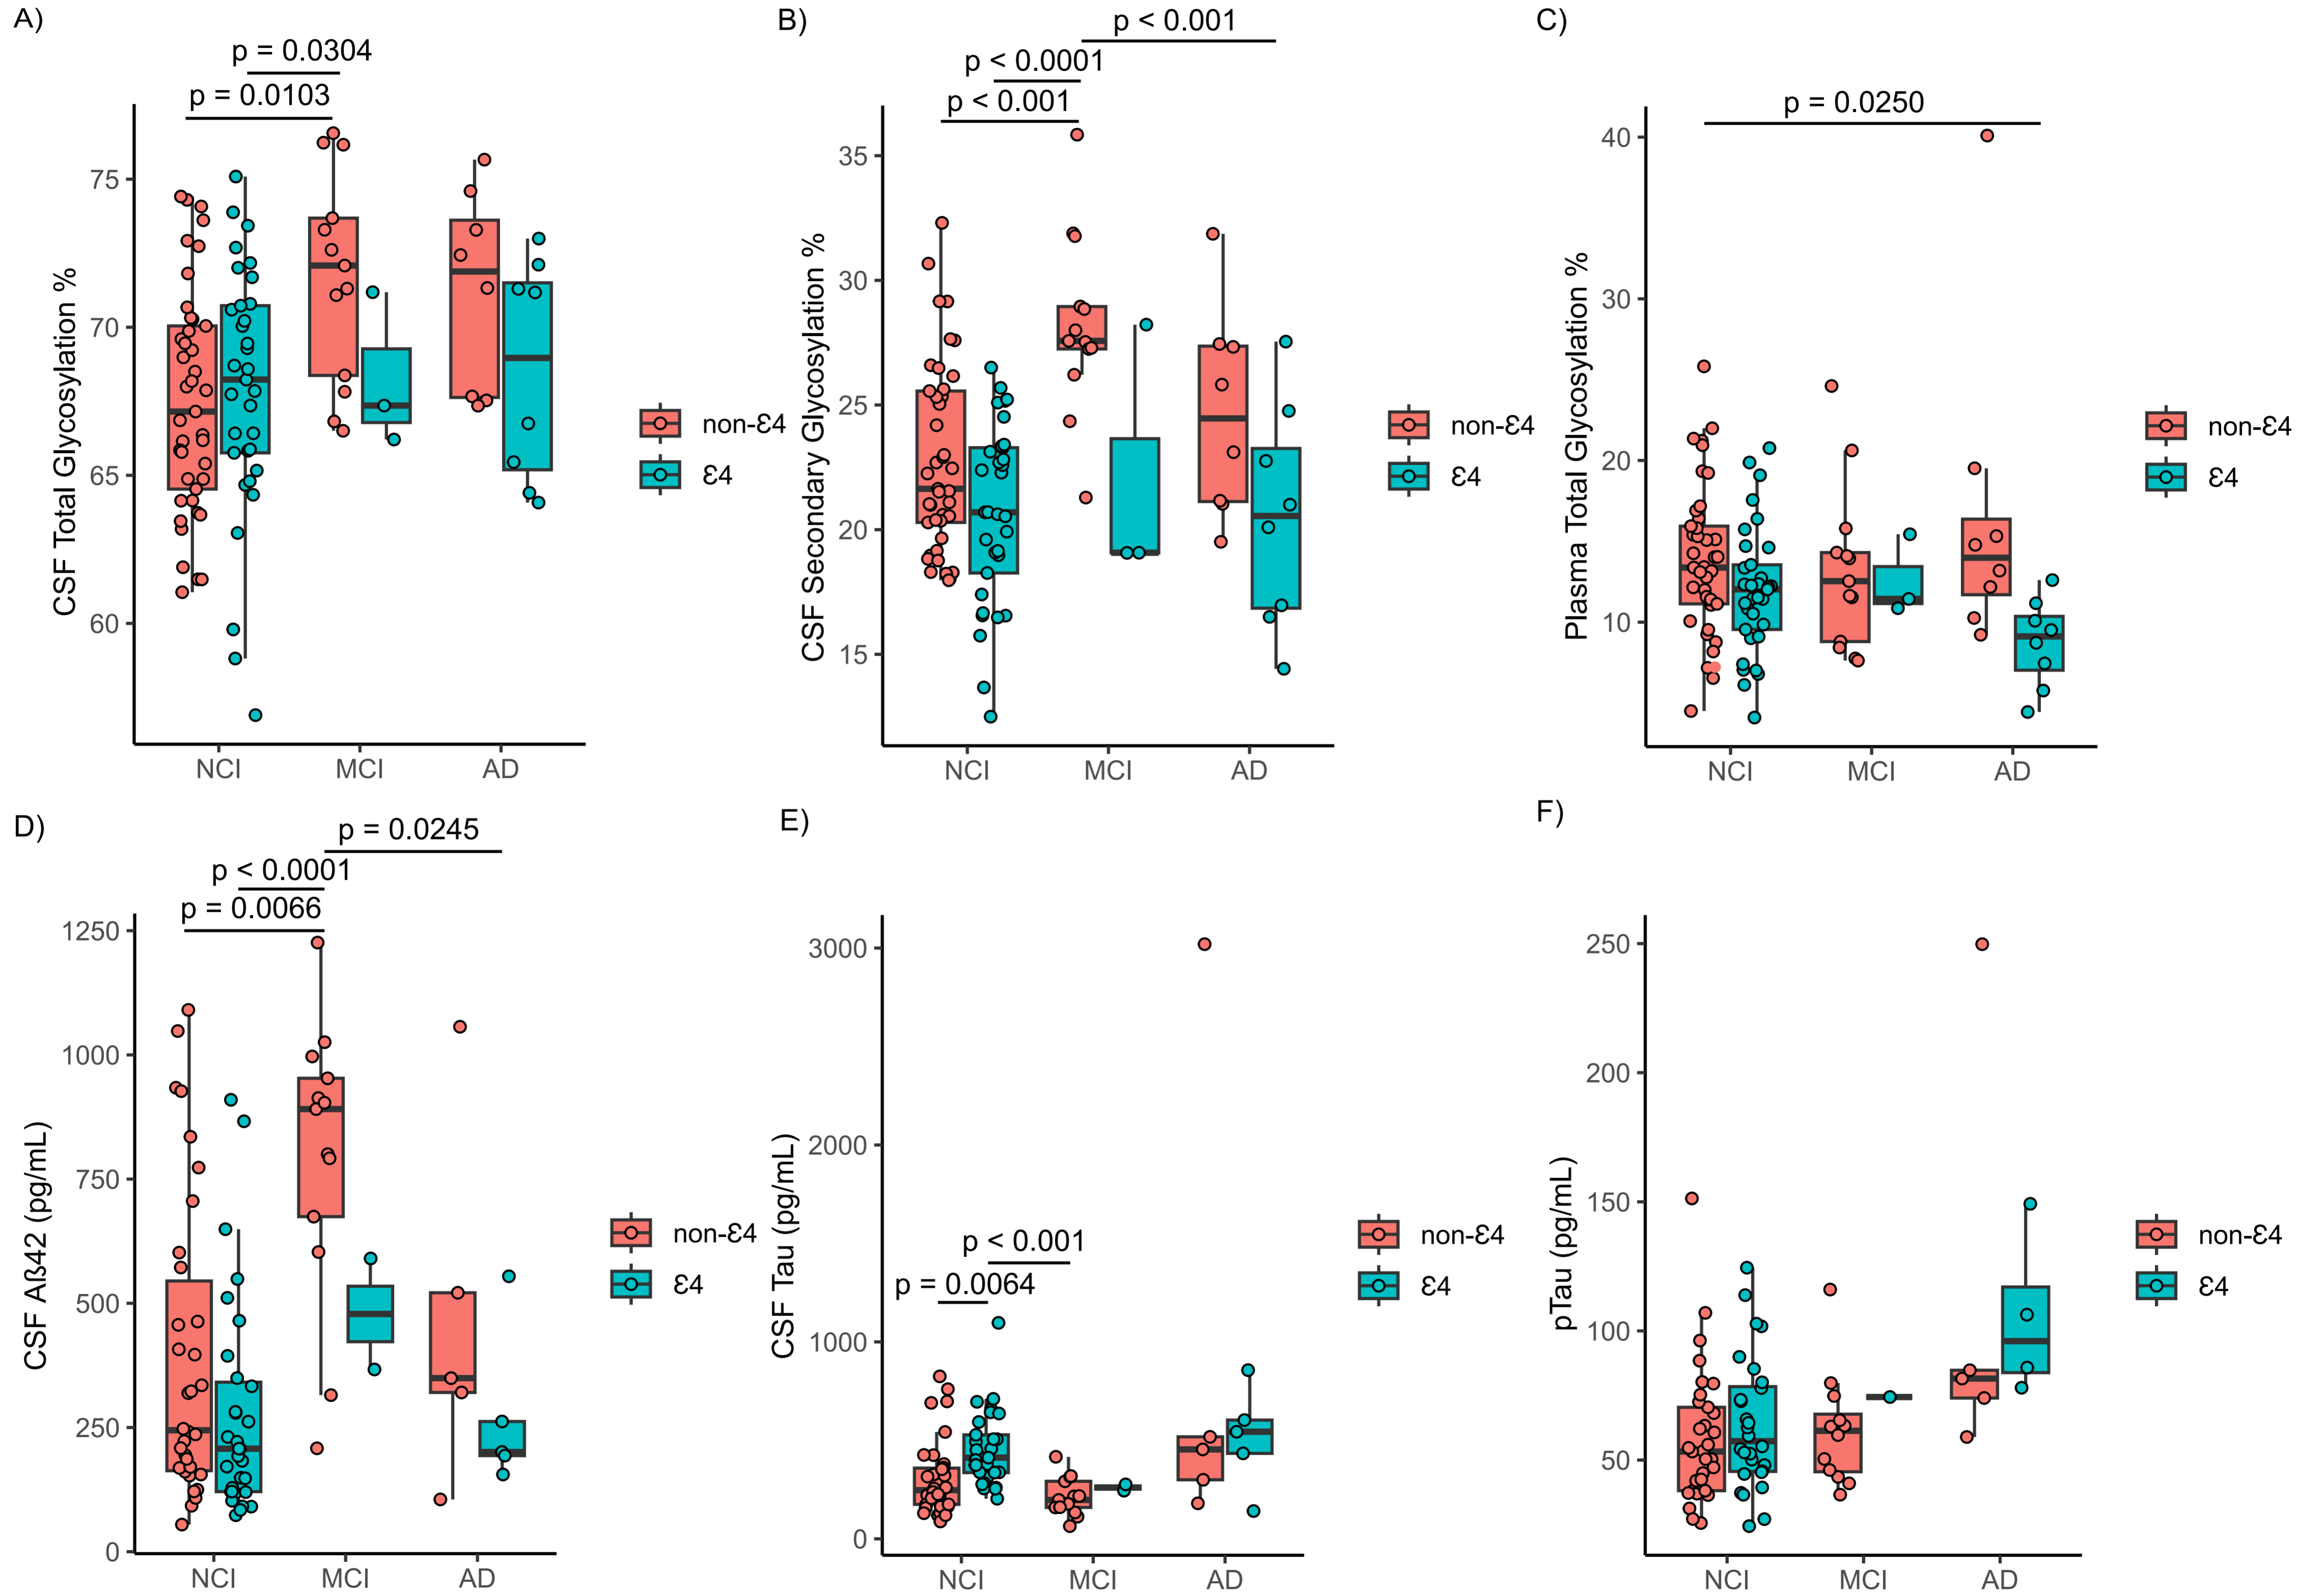

Figure 2S

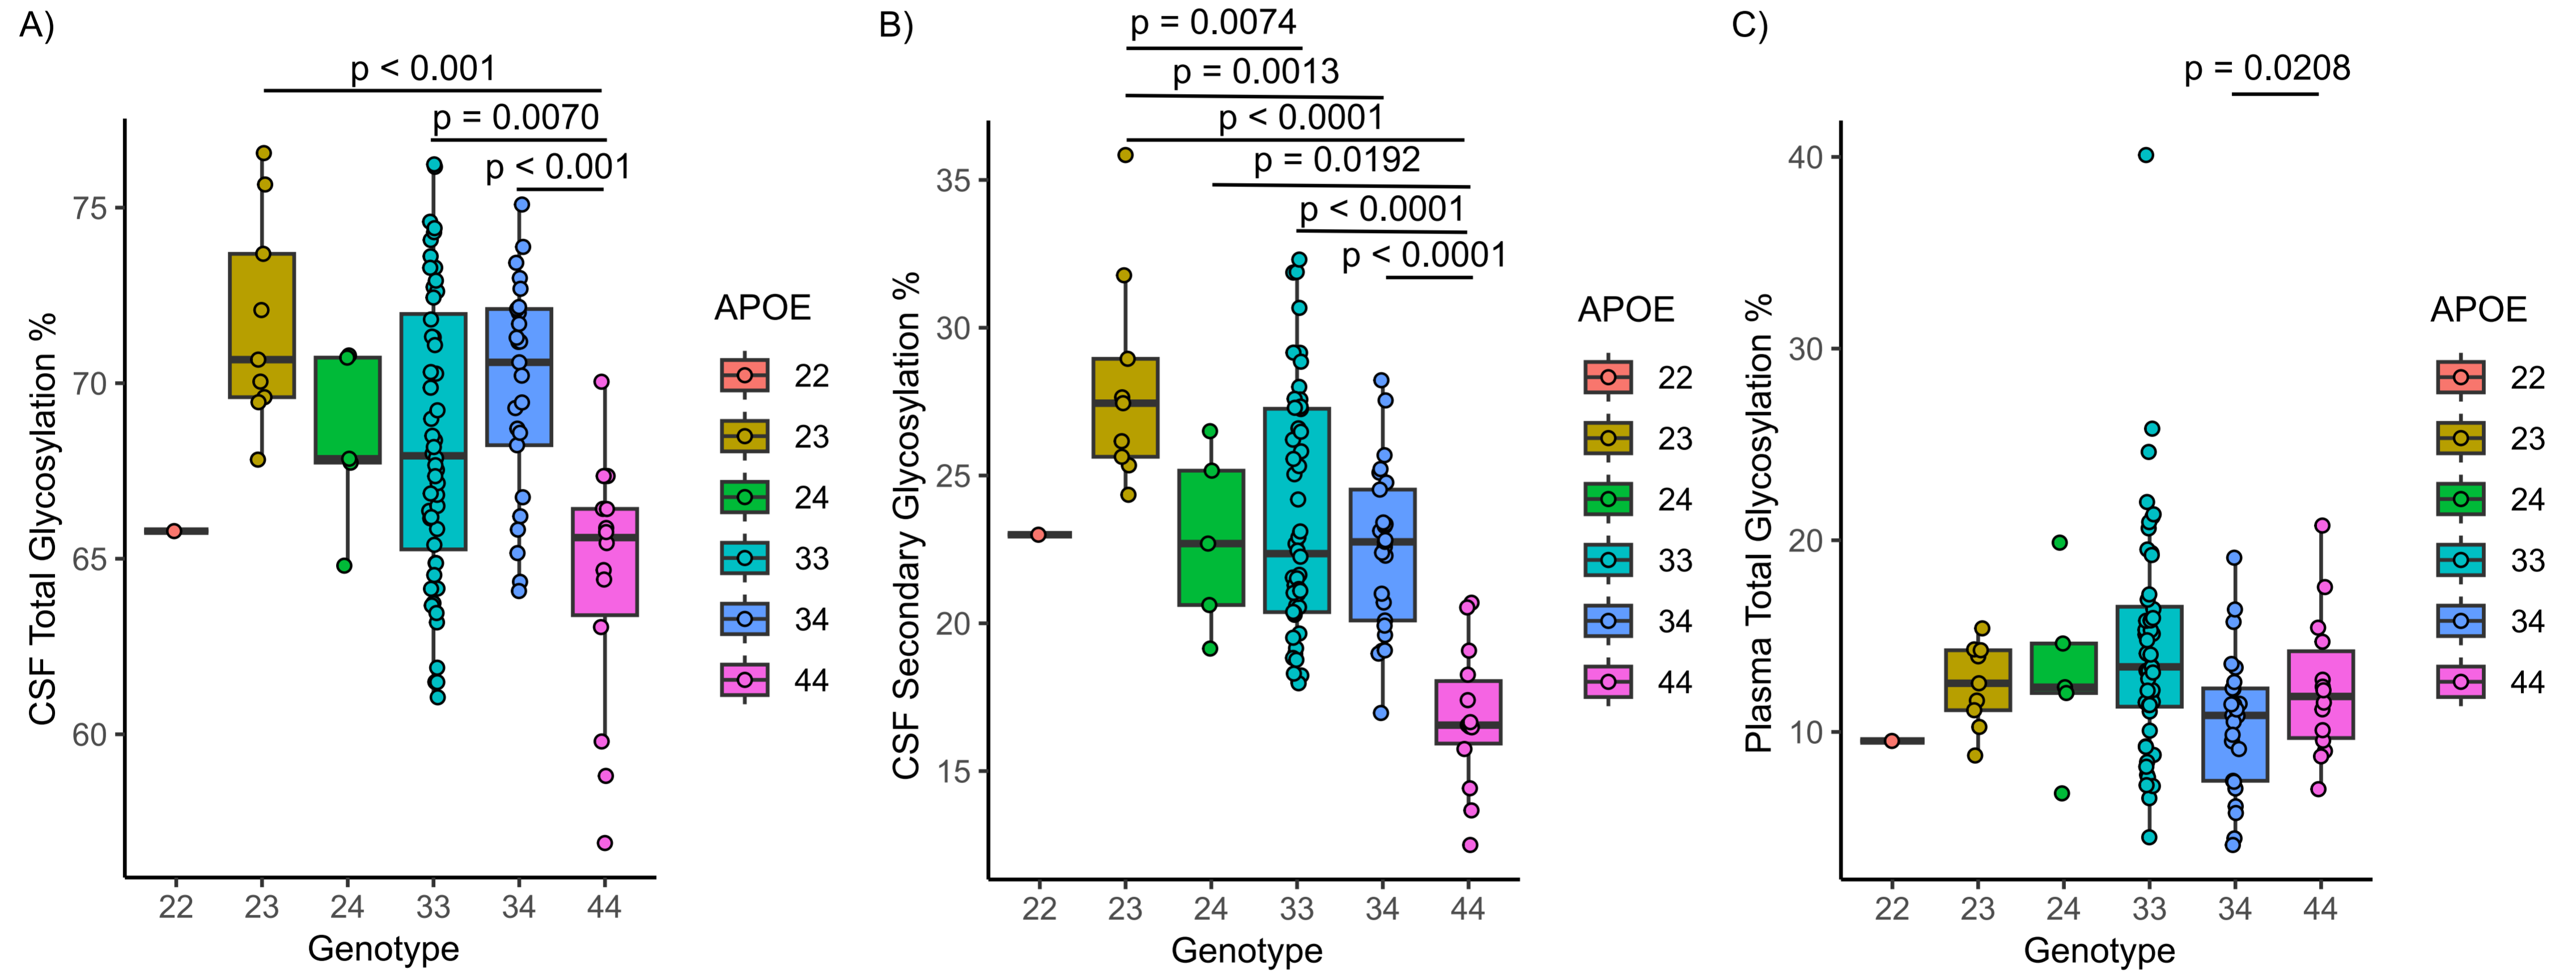

Figure 3S

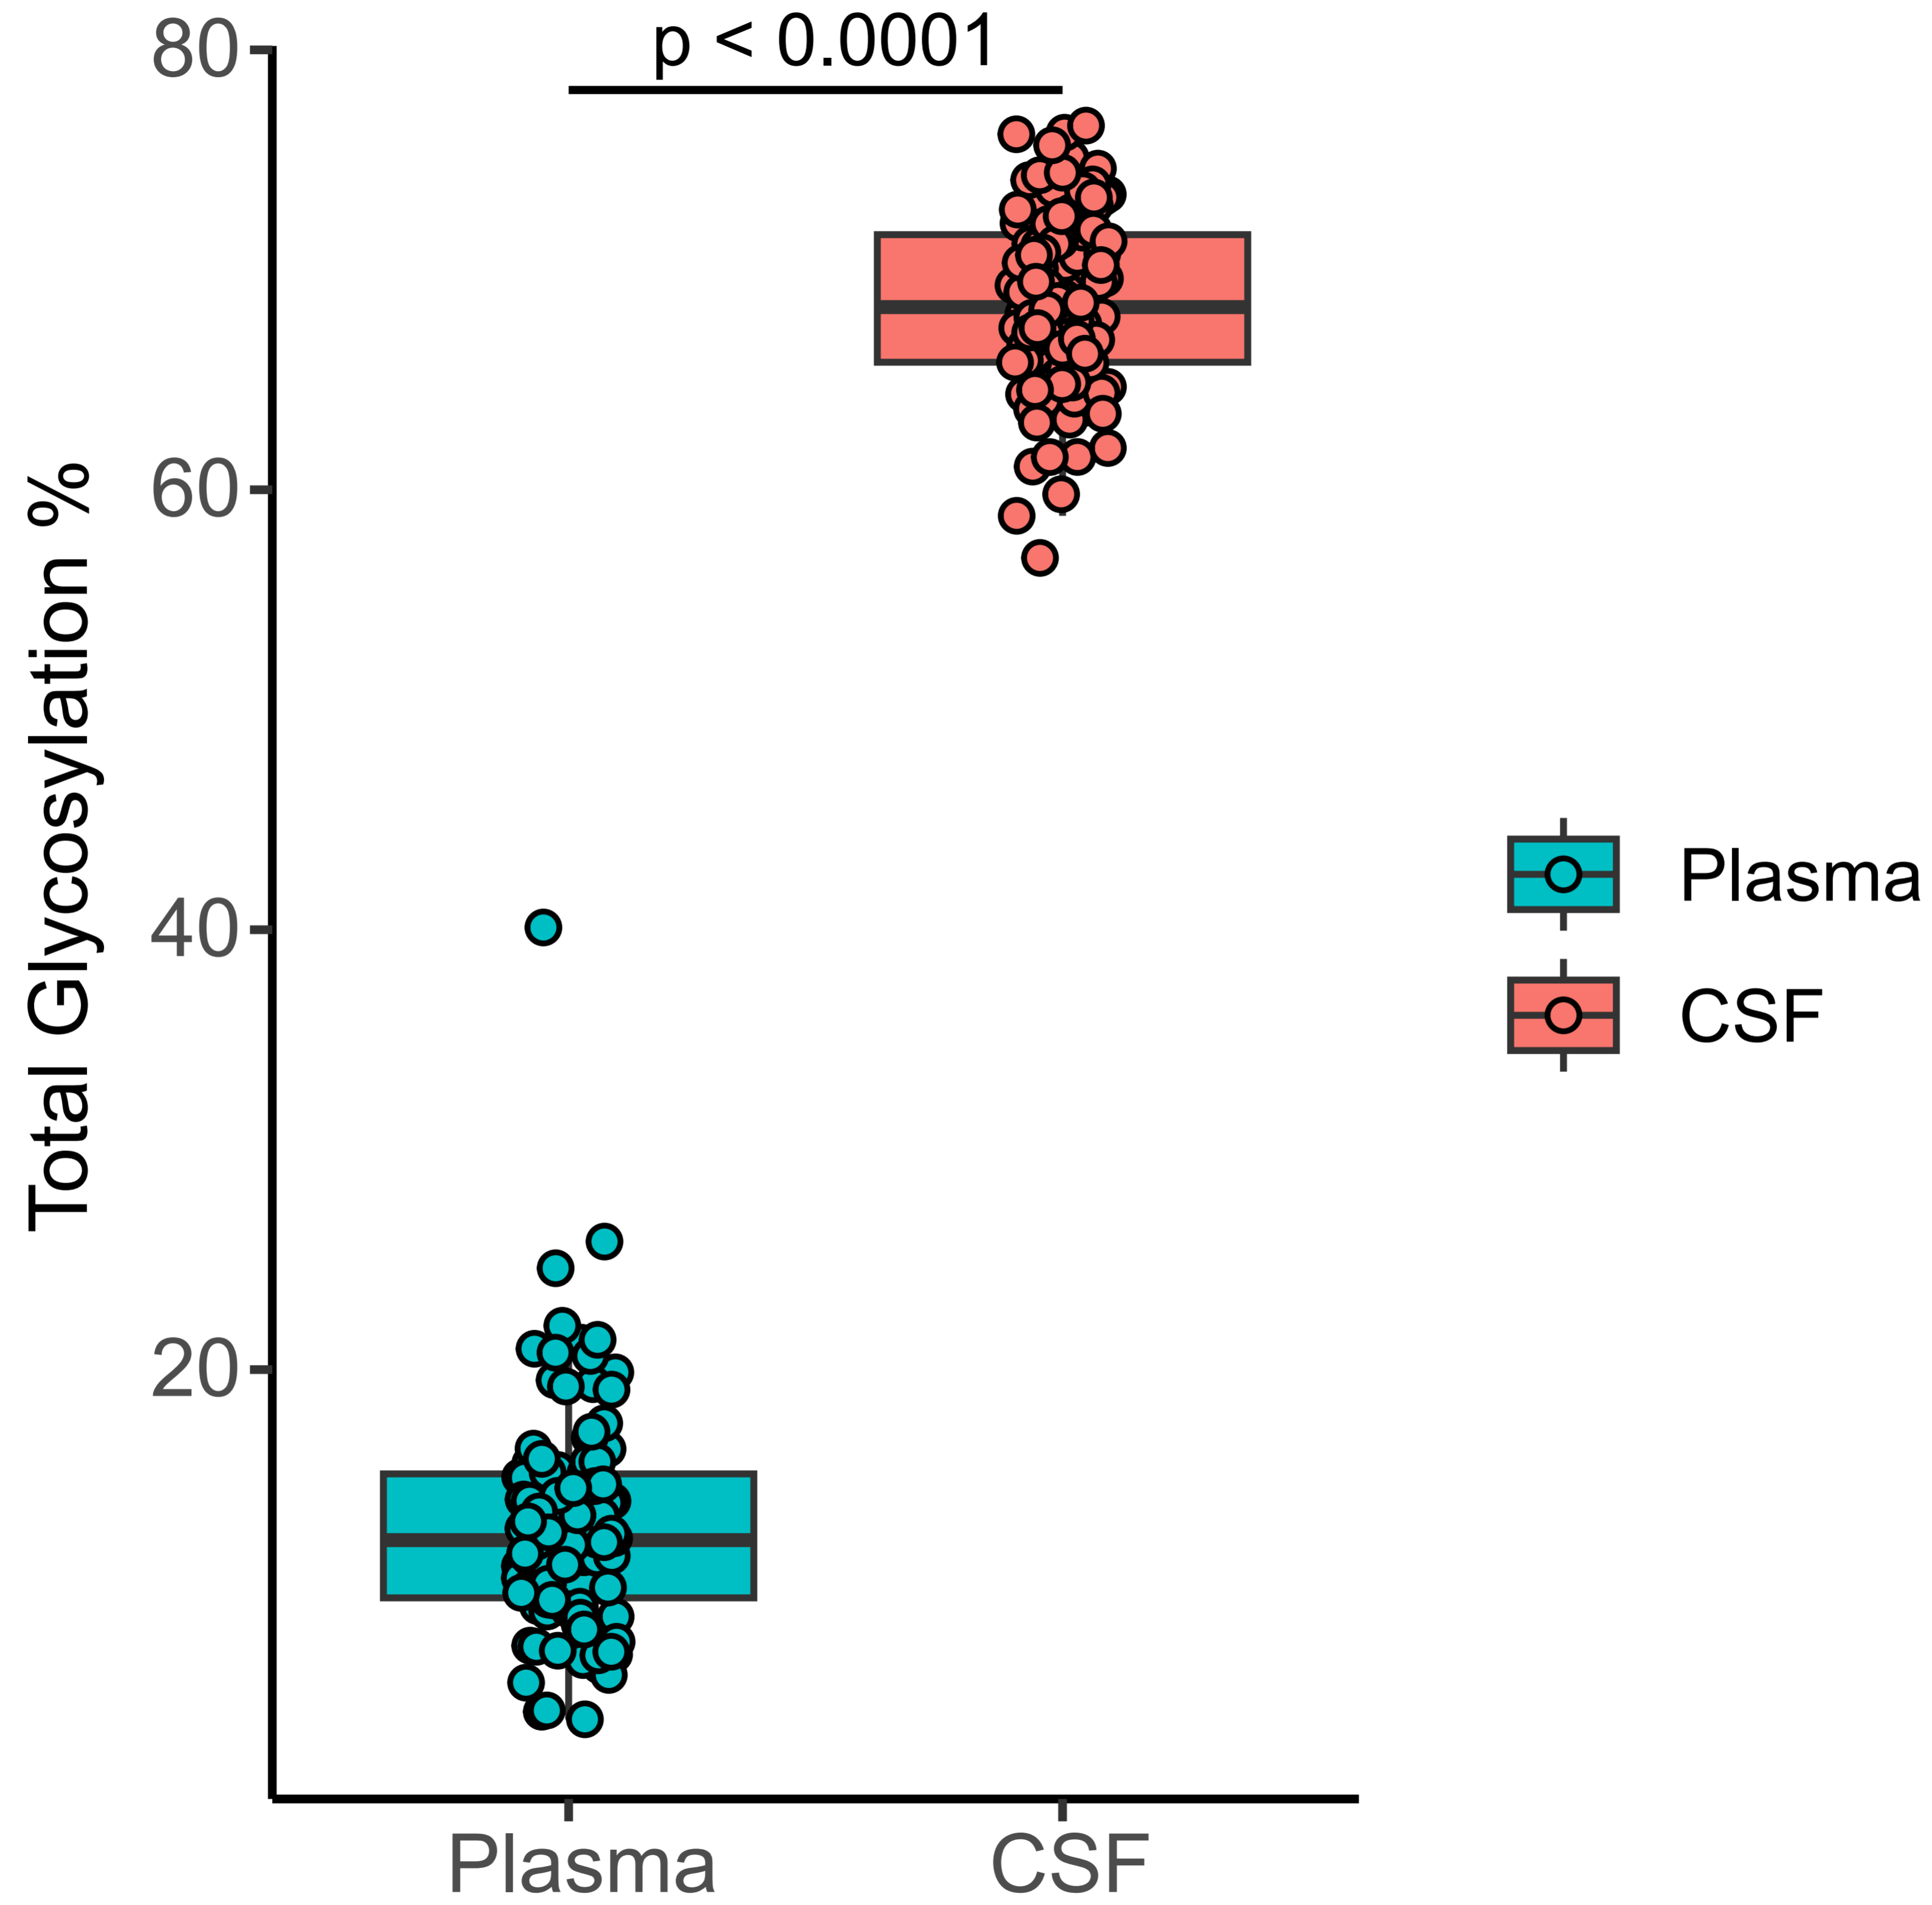

Figure 4S

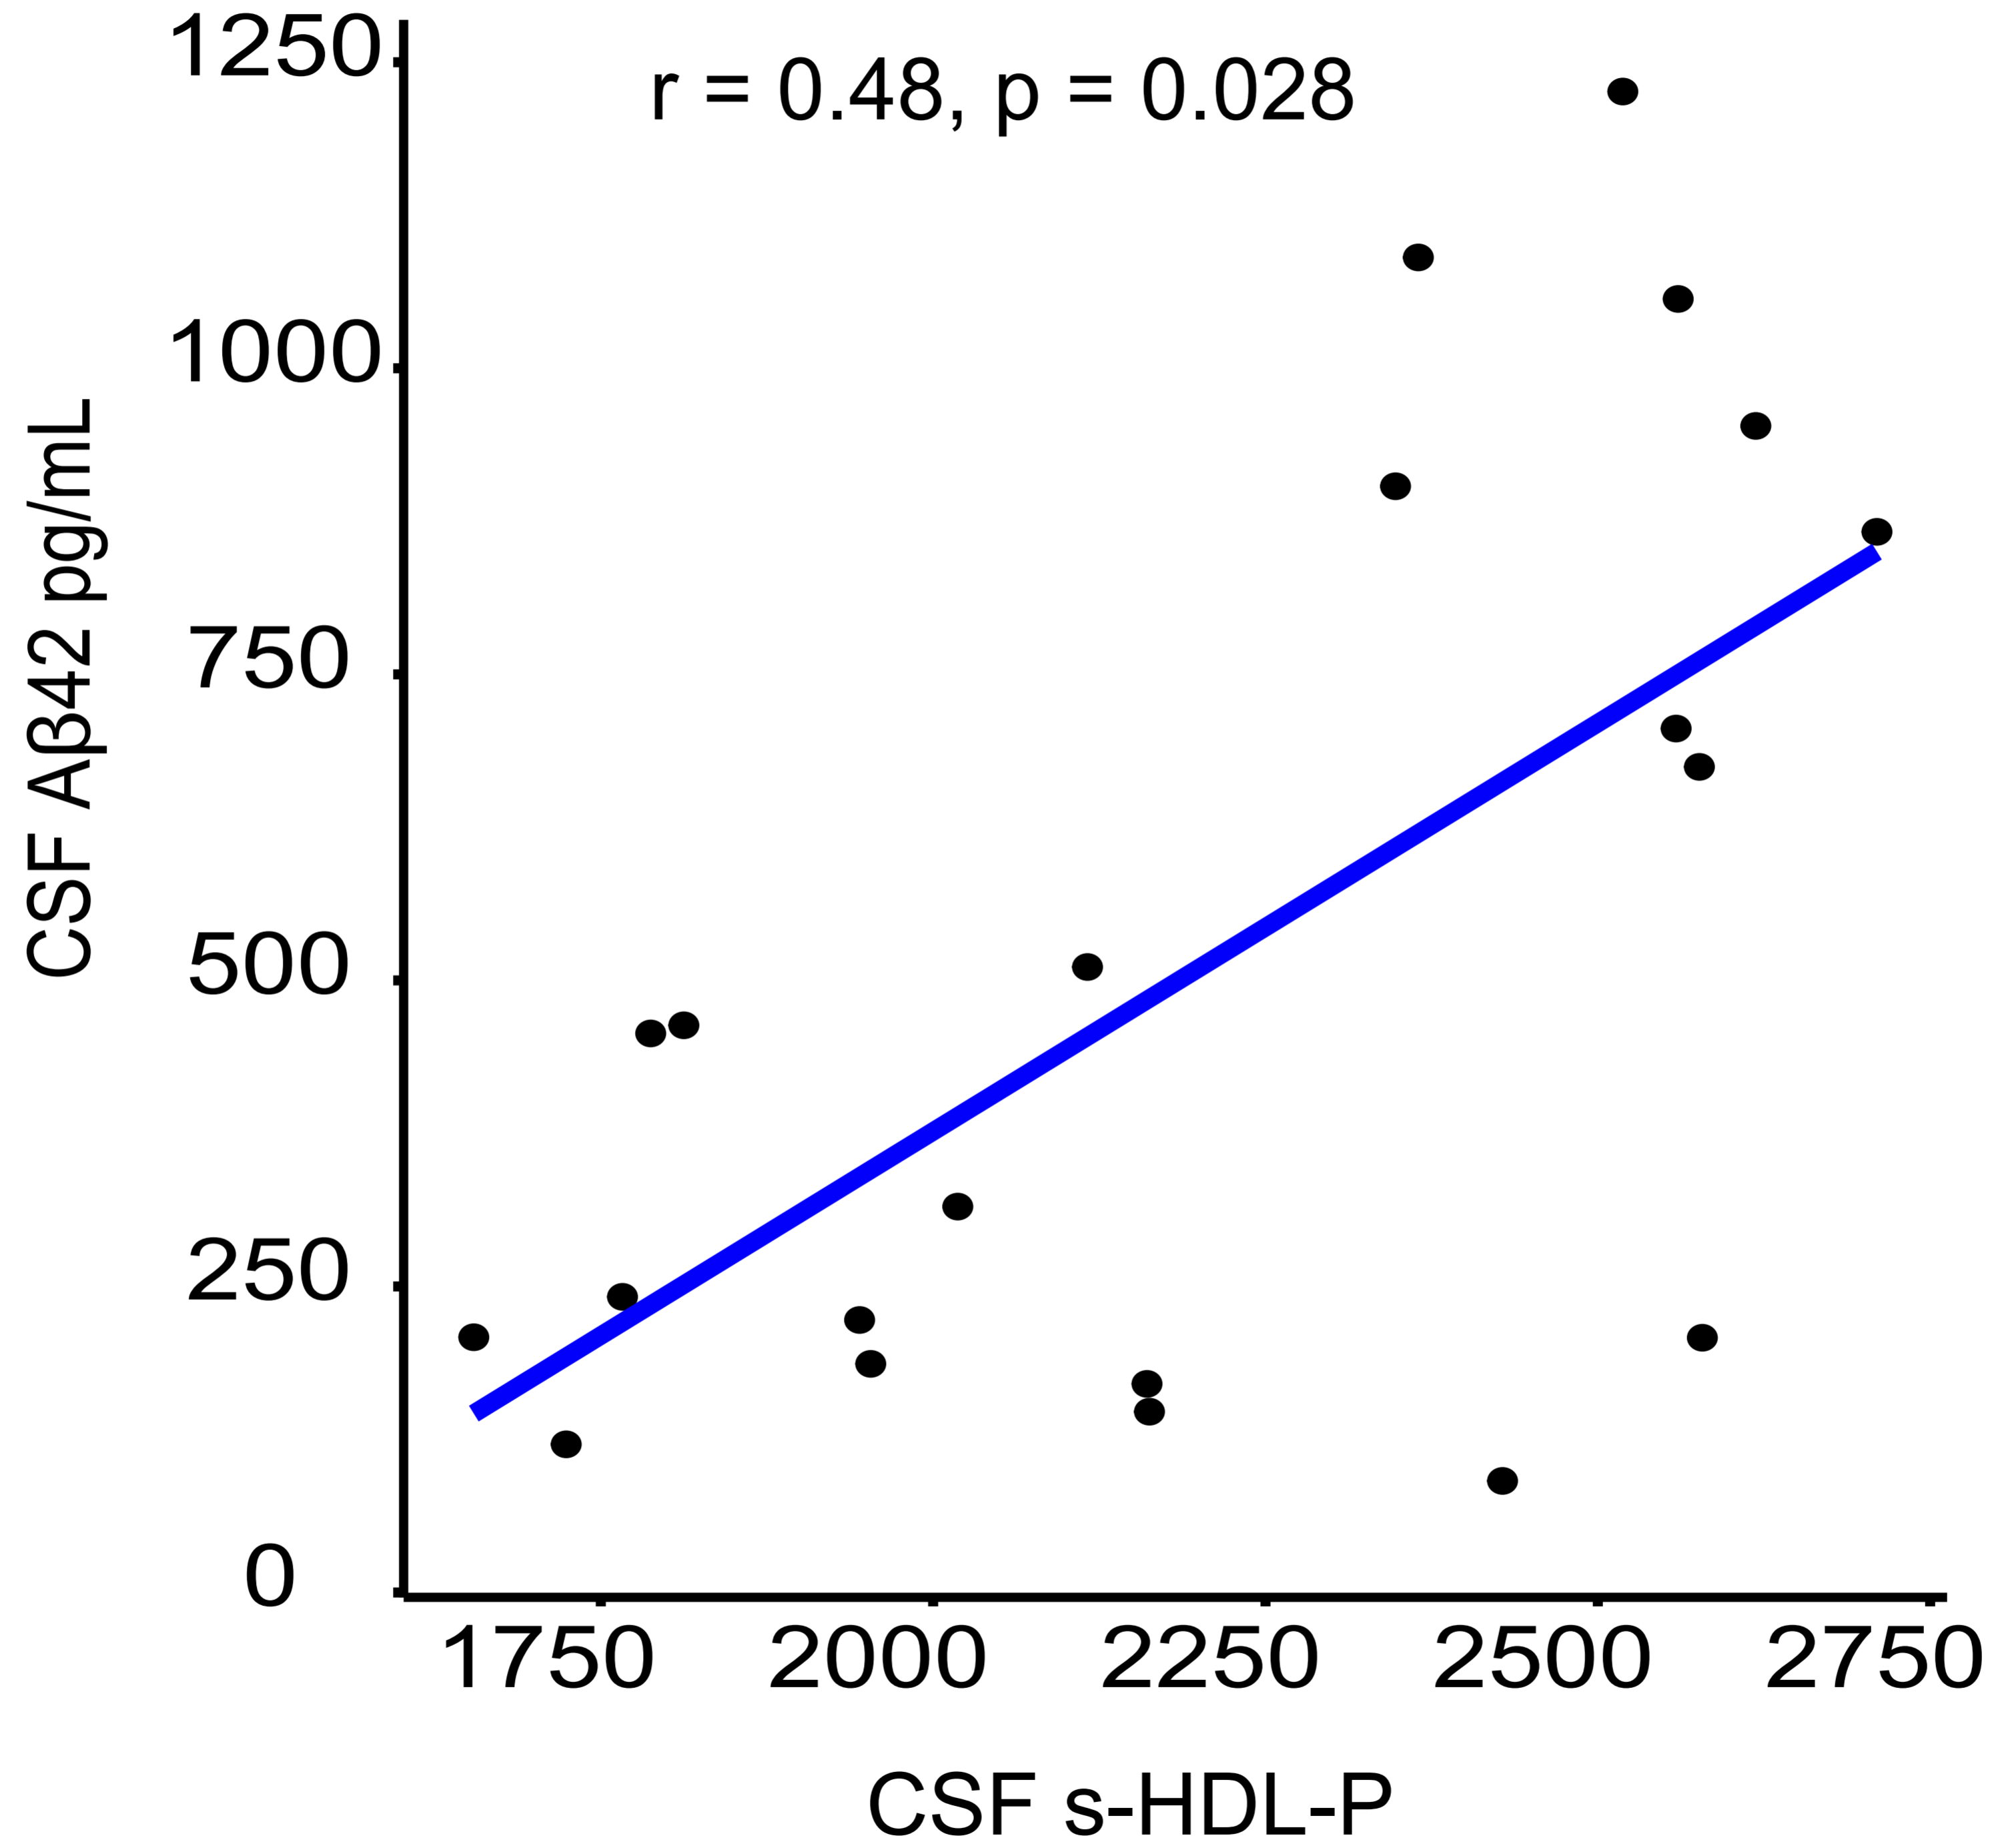

Figure 5S

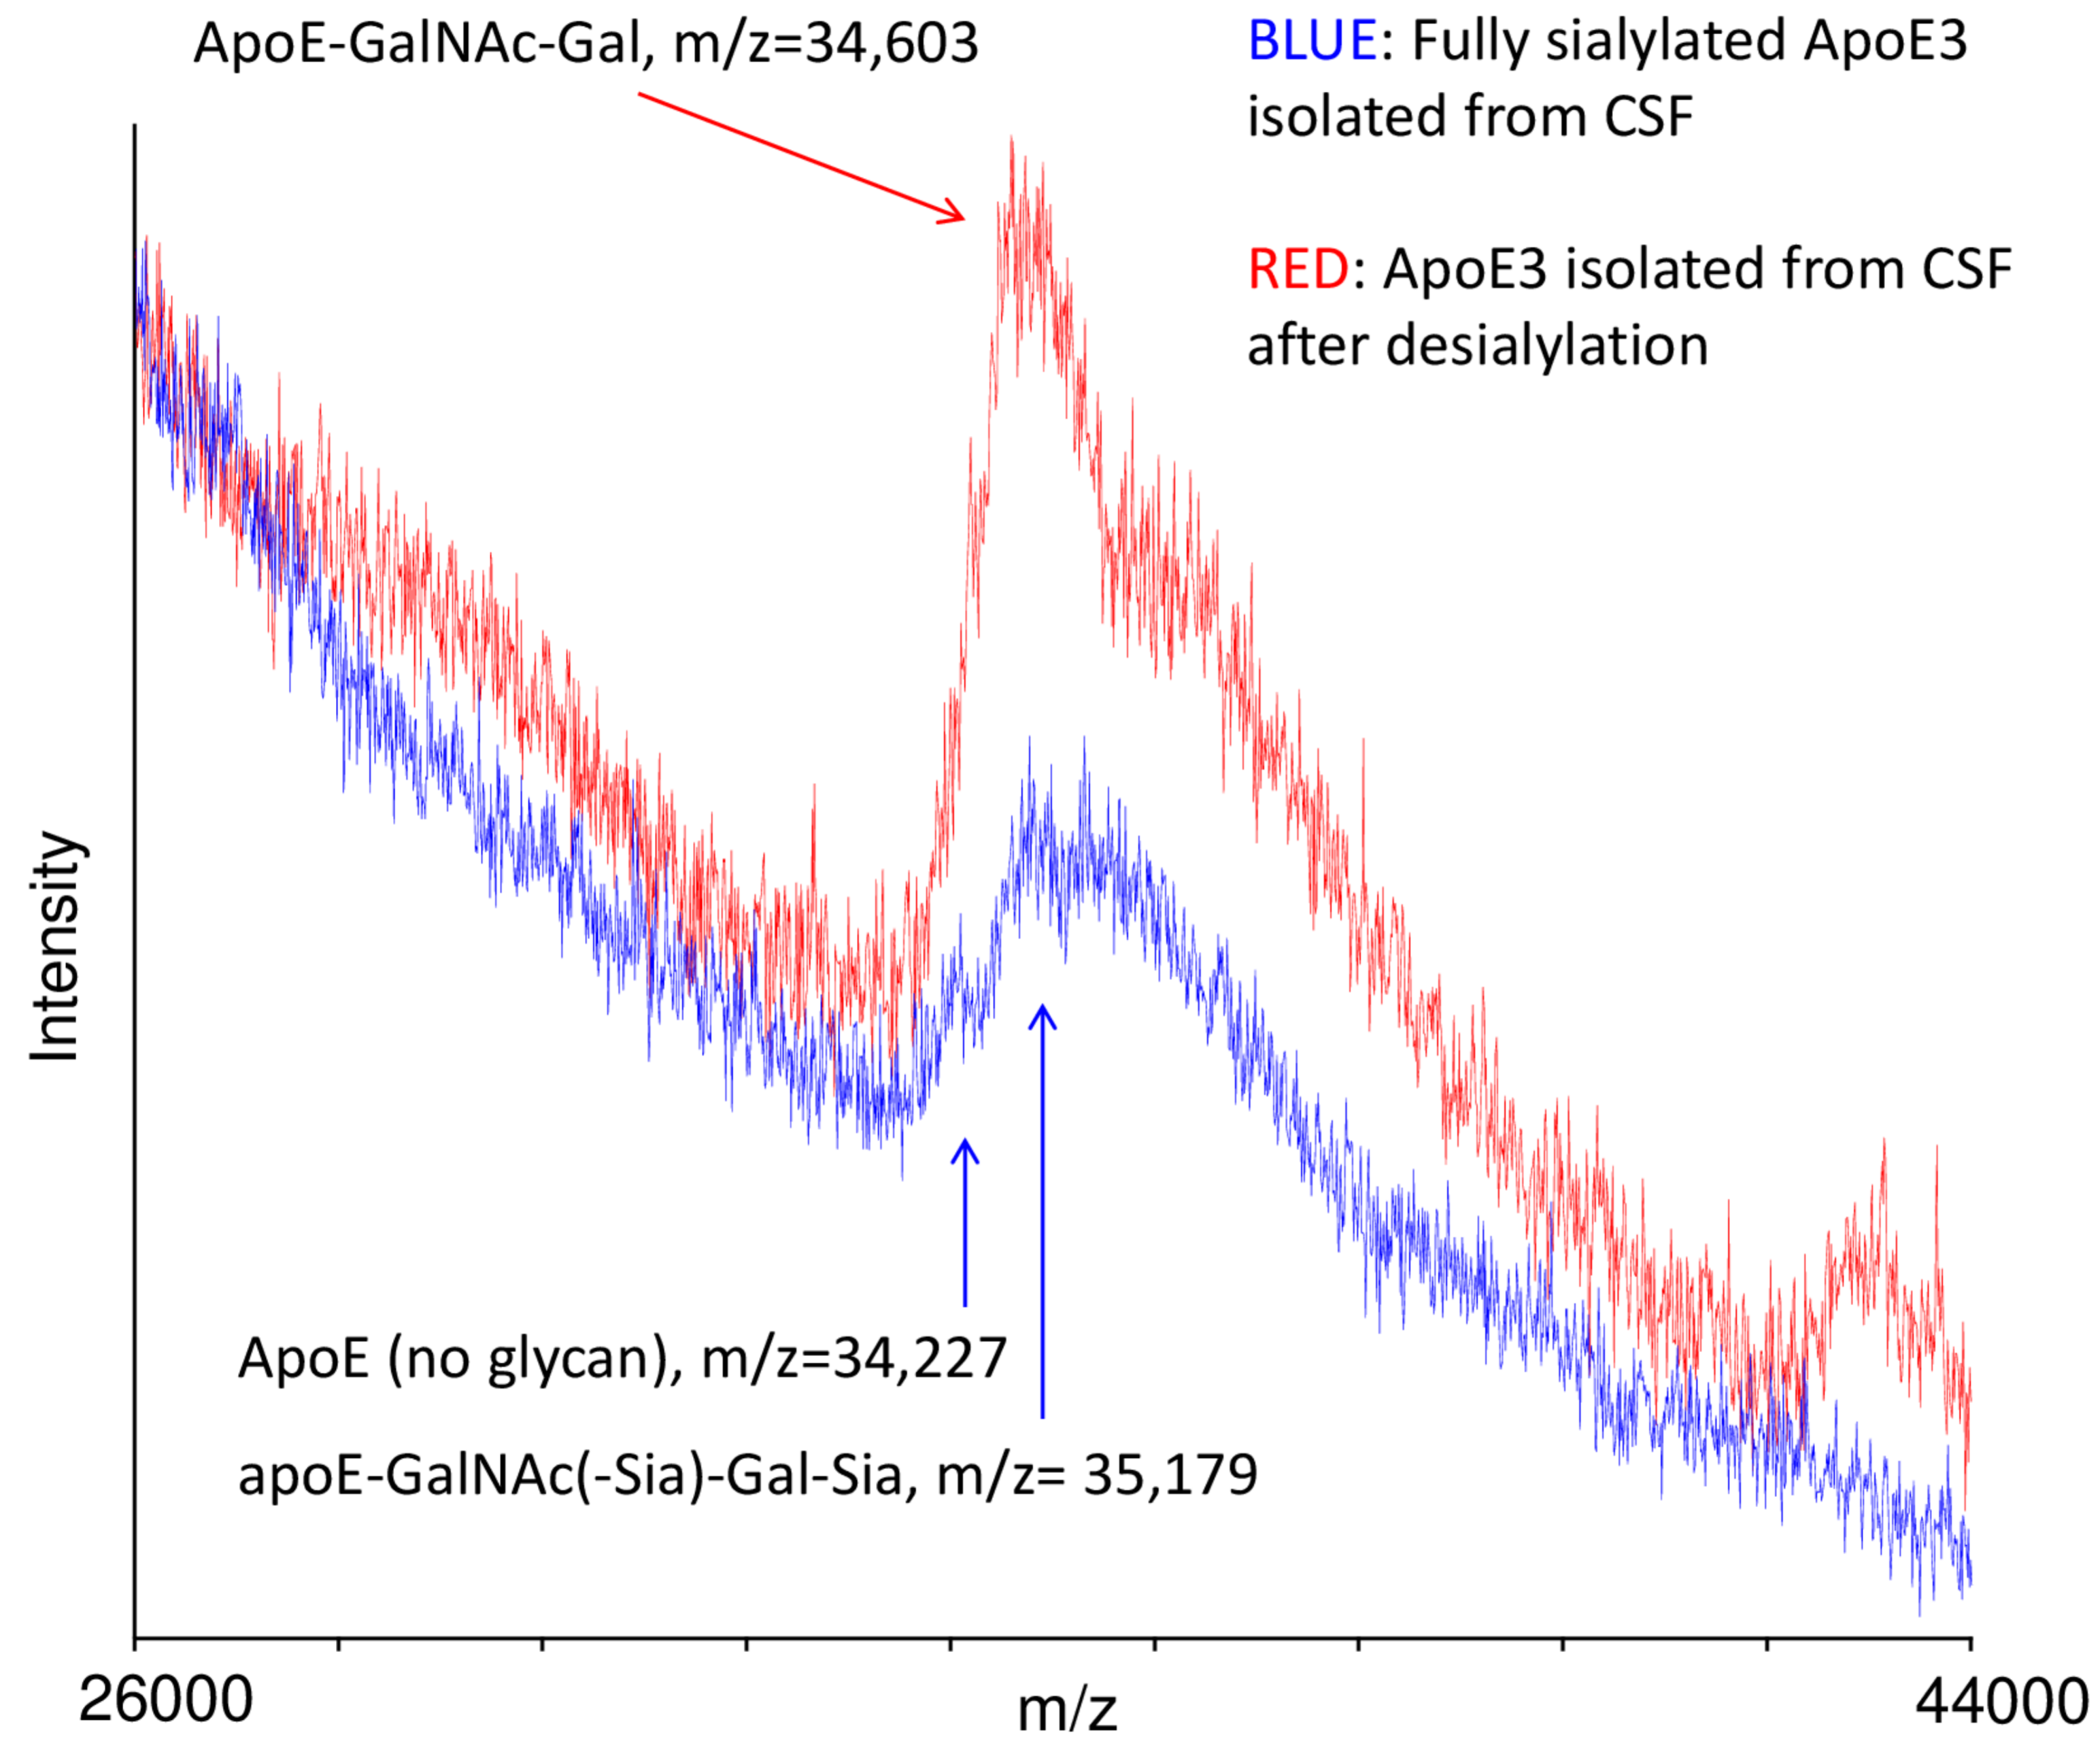

Supplement: MOESM1 [file 25394942]
